# Supplementary material for: Crystal clear: unveiling giant birefringence in organic–inorganic cocrystals
Source: Royal Society of Chemistry journal article supplement (doi:10.1039/d4sc02569e), 2024-01-01
Supplement: d4sc02569e1.pdf [file d4sc02569e1.pdf]

**Electronic Supplementary Information (ESI) for**

**Crystal clear: unveiling giant birefringence in organic-inorganic  
cocrystals**

Yang Li and Kang Min Ok\*

*Department of Chemistry, Sogang University, 35 Baekbeom-ro, Mapo-gu, Seoul 04107, Korea*

\*E-mail: kmok@sogang.ac.kr

**Table S1.** Crystallographic data for **Li-4HP**, **Li-4HP2**, and **Mg-4HP2**.

|                                                              | <b>Li-4HP</b>                                                                | <b>Li-4HP2</b>                                                               | <b>Mg-4HP2</b>                                                               |
|--------------------------------------------------------------|------------------------------------------------------------------------------|------------------------------------------------------------------------------|------------------------------------------------------------------------------|
| Temperature/K                                                | 171.00                                                                       | 140                                                                          | 293.00                                                                       |
| Crystal system                                               | monoclinic                                                                   | triclinic                                                                    | monoclinic                                                                   |
| Space group                                                  | <i>P2<sub>1</sub>/n</i>                                                      | <i>P</i> -1                                                                  | <i>I2/a</i>                                                                  |
| <i>a</i> /Å                                                  | 8.821(8)                                                                     | 8.2120(6)                                                                    | 24.6517(11)                                                                  |
| <i>b</i> /Å                                                  | 10.477(9)                                                                    | 8.9624(6)                                                                    | 6.4107(3)                                                                    |
| <i>c</i> /Å                                                  | 9.205(9)                                                                     | 9.9320(7)                                                                    | 26.2782(12)                                                                  |
| $\alpha$ /°                                                  | 90                                                                           | 82.101(2)                                                                    | 90                                                                           |
| $\beta$ /°                                                   | 110.89(3)                                                                    | 68.227(2)                                                                    | 106.673(2)                                                                   |
| $\gamma$ /°                                                  | 90                                                                           | 70.184(2)                                                                    | 90                                                                           |
| Volume/Å <sup>3</sup>                                        | 794.8(13)                                                                    | 638.59(8)                                                                    | 3978.3(3)                                                                    |
| <i>Z</i>                                                     | 4                                                                            | 1                                                                            | 8                                                                            |
| $\rho_{\text{calc}}$ g/cm <sup>3</sup>                       | 1.522                                                                        | 1.441                                                                        | 1.491                                                                        |
| $\mu$ /mm <sup>-1</sup>                                      | 0.134                                                                        | 0.119                                                                        | 0.166                                                                        |
| <i>F</i> (000)                                               | 376.0                                                                        | 288.0                                                                        | 1872.0                                                                       |
| Crystal size/mm <sup>3</sup>                                 | 0.216 × 0.126 × 0.098                                                        | 0.289 × 0.21 × 0.178                                                         | 0.271 × 0.242 × 0.152                                                        |
| Radiation                                                    | MoK $\alpha$ ( $\lambda$ = 0.71073)                                          |                                                                              |                                                                              |
| 2 $\theta$ range for data collection/°                       | 5.494 to 54.966                                                              | 4.832 to 56.634                                                              | 5.366 to 55.148                                                              |
| Index ranges                                                 | -11 ≤ <i>h</i> ≤ 11, -13 ≤ <i>k</i> ≤ 13, -11 ≤ <i>l</i> ≤ 11                | -10 ≤ <i>h</i> ≤ 10, -11 ≤ <i>k</i> ≤ 11, -13 ≤ <i>l</i> ≤ 13                | -32 ≤ <i>h</i> ≤ 32, -8 ≤ <i>k</i> ≤ 8, -34 ≤ <i>l</i> ≤ 34                  |
| Reflections collected                                        | 14271                                                                        | 14595                                                                        | 57494                                                                        |
| Independent reflections                                      | 1823 [ <i>R</i> <sub>int</sub> = 0.1264, <i>R</i> <sub>sigma</sub> = 0.0732] | 3158 [ <i>R</i> <sub>int</sub> = 0.0502, <i>R</i> <sub>sigma</sub> = 0.0377] | 4602 [ <i>R</i> <sub>int</sub> = 0.1047, <i>R</i> <sub>sigma</sub> = 0.0495] |
| Data/restraints/parameters                                   | 1823/1/122                                                                   | 3158/1/184                                                                   | 4602/3/292                                                                   |
| Goodness-of-fit on <i>F</i> <sup>2</sup>                     | 1.019                                                                        | 1.037                                                                        | 1.176                                                                        |
| Final <i>R</i> indexes [ <i>I</i> ≥ 2 $\sigma$ ( <i>I</i> )] | <i>R</i> <sub>1</sub> = 0.0535, <i>wR</i> <sub>2</sub> = 0.1130              | <i>R</i> <sub>1</sub> = 0.0404, <i>wR</i> <sub>2</sub> = 0.1094              | <i>R</i> <sub>1</sub> = 0.0843, <i>wR</i> <sub>2</sub> = 0.1705              |
| Final <i>R</i> indexes [all data]                            | <i>R</i> <sub>1</sub> = 0.0926, <i>wR</i> <sub>2</sub> = 0.1307              | <i>R</i> <sub>1</sub> = 0.0454, <i>wR</i> <sub>2</sub> = 0.1133              | <i>R</i> <sub>1</sub> = 0.1177, <i>wR</i> <sub>2</sub> = 0.1859              |
| Largest diff. peak/hole / e Å <sup>-3</sup>                  | 0.24/-0.23                                                                   | 0.43/-0.23                                                                   | 0.30/-0.34                                                                   |

<sup>[a]</sup> $R_1 = \sum ||F_o| - |F_c|| / \sum |F_o|$  and  $wR_2 = [\sum w(F_o^2 - F_c^2)^2 / \sum wF_o^4]^{1/2}$  for  $F_o^2 > 2\sigma(F_o^2)$

**Table S2.** Atomic coordinates ( $\times 10^4$ ) and equivalent isotropic displacement parameters ( $\text{\AA}^2 \times 10^3$ ) for **Li-4HP**, **Li-4HP2**, and **Mg-4HP**.  $U_{\text{eq}}$  is defined as 1/3 of the trace of the orthogonalized  $U_{ij}$  tensor.

| Atom           | x          | y          | z          | $U_{\text{eq}}$ |
|----------------|------------|------------|------------|-----------------|
| <b>Li-4HP</b>  |            |            |            |                 |
| O1             | 9047.7(19) | 5381.4(16) | 3572.2(17) | 28.9(4)         |
| O3             | 7603.2(19) | 3744.9(15) | 6346.9(18) | 30.9(4)         |
| O2             | 8024(2)    | 6715.1(16) | 6306.6(19) | 33.4(5)         |
| O5             | 5280(2)    | 2791.3(16) | 5495(2)    | 38.0(5)         |
| O4             | 5909(2)    | 4217.4(16) | 4077.0(19) | 38.3(5)         |
| N2             | 6250(2)    | 3583.9(17) | 5295(2)    | 23.9(4)         |
| N1             | 6097(3)    | 6038.7(19) | 9127(2)    | 32.2(5)         |
| C1             | 8122(3)    | 5596(2)    | 2175(2)    | 22.4(5)         |
| C5             | 8309(3)    | 4945(2)    | 890(3)     | 29.2(6)         |
| C4             | 7309(3)    | 5182(2)    | 9424(3)    | 34.0(6)         |
| C2             | 6820(3)    | 6491(2)    | 1784(3)    | 29.1(6)         |
| C3             | 5860(3)    | 6693(2)    | 285(3)     | 33.5(6)         |
| Li1            | 8704(5)    | 5170(4)    | 5526(4)    | 28.4(9)         |
| <b>Li-4HP2</b> |            |            |            |                 |
| O5             | 8019.7(13) | 3525.9(12) | 3509.4(11) | 29.6(2)         |
| O6             | 86.2(14)   | 1693.0(10) | 729.8(10)  | 25.7(2)         |
| O2             | 8981.8(11) | 9162.7(10) | 2152.5(9)  | 20.86(19)       |
| O1             | 8161.1(11) | 5499.2(10) | 390.3(9)   | 19.50(19)       |
| O7             | 9566.9(13) | 2152.8(13) | 4861.7(10) | 32.3(2)         |
| O3             | 885.3(13)  | 3339.1(12) | 2898.4(10) | 29.9(2)         |
| N3             | 9493.8(14) | 3007.7(12) | 3771.0(10) | 19.9(2)         |
| N4             | 2557.2(13) | 7284.4(12) | 1735.3(11) | 21.1(2)         |
| N2             | 3960.0(14) | 8516.5(13) | 4184.5(11) | 23.5(2)         |
| C6             | 5717.9(16) | 200.4(13)  | 2920.3(12) | 19.6(2)         |
| C5             | 5482.5(15) | 7577.0(13) | 337.4(12)  | 18.8(2)         |
| C3             | 3361.0(16) | 5817.0(15) | 2179.8(13) | 21.1(2)         |
| C11            | 3600.2(16) | 8144.3(14) | 825.2(13)  | 20.8(2)         |
| C9             | 7211.1(16) | 7501.3(14) | 3515.4(13) | 20.5(2)         |
| C10            | 7400.9(15) | 8967.8(13) | 2828.9(11) | 15.8(2)         |
| C8             | 5509.3(17) | 7318.1(15) | 4160.2(13) | 22.9(3)         |
| C7             | 4053.9(16) | 9943.8(15) | 3585.6(13) | 22.8(2)         |
| C2             | 5235.1(16) | 5179.0(13) | 1742.8(12) | 18.6(2)         |
| C1             | 6408.7(15) | 6049.1(13) | 796.9(11)  | 15.6(2)         |
| Li1            | 9869(3)    | 3823(2)    | 1118(2)    | 20.0(4)         |
| <b>Mg-4HP</b>  |            |            |            |                 |

| Atom | <i>x</i>   | <i>y</i>   | <i>z</i>   | <i>U</i> <sub>(eq)</sub> |
|------|------------|------------|------------|--------------------------|
| Mg1  | 5005.5(6)  | 7407.3(15) | 6269.3(5)  | 24.3(3)                  |
| O8   | 4453.2(11) | 2417(4)    | 7079.5(10) | 34.3(6)                  |
| O6   | 4877.3(11) | 4567(4)    | 5892.3(11) | 37.9(6)                  |
| O1   | 4813.7(11) | 6275(4)    | 6938.2(10) | 34.9(6)                  |
| O3   | 5132.1(12) | 10265(4)   | 6616.9(12) | 40.0(7)                  |
| O7   | 5537.5(12) | 2451(4)    | 5403.1(11) | 37.2(7)                  |
| O4   | 5198.9(11) | 8530(4)    | 5596.9(10) | 36.0(6)                  |
| O5   | 5851.4(11) | 6798(4)    | 6613.0(12) | 39.6(7)                  |
| O2   | 4156.8(11) | 8045(4)    | 5927.3(12) | 42.0(7)                  |
| O9   | 3333.1(12) | 4963(4)    | 5712.9(13) | 49.7(8)                  |
| O10  | 3866.3(13) | 2285(4)    | 5718.7(14) | 51.5(8)                  |
| O13  | 6666.3(13) | 9958(4)    | 6760.0(15) | 59.7(9)                  |
| O12  | 6126.3(14) | 2592(4)    | 6763.7(16) | 59.1(10)                 |
| O14  | 7013.2(13) | 3048(5)    | 6860.0(15) | 61.6(9)                  |
| N4   | 3389.2(14) | 3022(5)    | 5676.7(13) | 34.6(7)                  |
| O11  | 2974.9(13) | 1882(5)    | 5606.6(15) | 62.8(10)                 |
| N3   | 6607.2(14) | 1885(5)    | 6797.9(13) | 38.2(8)                  |
| N1   | 7181.1(14) | 3949(6)    | 5579.1(14) | 43.0(8)                  |
| N2   | 2807.3(15) | 1022(6)    | 6902.5(15) | 49.3(9)                  |
| C6   | 3932.4(15) | 1967(6)    | 7023.2(14) | 28.8(7)                  |
| C3   | 6053.7(16) | 2922(6)    | 5451.8(14) | 28.7(7)                  |
| C2   | 6261.2(17) | 4993(6)    | 5554.0(16) | 38.2(9)                  |
| C10  | 3732.9(17) | 9899(6)    | 6965.4(19) | 45.5(10)                 |
| C1   | 6809.8(18) | 5445(6)    | 5611.9(17) | 43.9(10)                 |
| C7   | 3523.4(18) | 3524(6)    | 7018.6(18) | 46.5(11)                 |
| C4   | 6466.5(18) | 1410(6)    | 5412.3(17) | 42.6(10)                 |
| C5   | 7012.0(19) | 1967(7)    | 5478.9(19) | 48.6(11)                 |
| C9   | 3180.4(19) | 9499(7)    | 6910(2)    | 54.8(12)                 |
| C8   | 2977.1(19) | 3005(7)    | 6958(2)    | 53.7(12)                 |

**Table S3.** Interatomic distances (Å) for **Li-4HP**, **Li-4HP2**, and **Mg-4HP**.

| Atom                     | Atom             | Length     | Atom | Atom | Length     |
|--------------------------|------------------|------------|------|------|------------|
| <b>Li-4HP</b>            |                  |            |      |      |            |
| O1                       | C1               | 1.274(3)   | O4   | Li1  | 2.551(5)   |
| O1                       | Li1 <sup>1</sup> | 1.945(5)   | N1   | C4   | 1.347(3)   |
| O1                       | Li1              | 1.940(4)   | N1   | C3   | 1.345(3)   |
| O3                       | N2               | 1.252(3)   | C1   | C5   | 1.425(3)   |
| O3                       | Li1              | 2.065(4)   | C1   | C2   | 1.426(3)   |
| O2                       | Li1              | 1.950(4)   | C5   | C4   | 1.347(3)   |
| O5                       | N2               | 1.253(3)   | C2   | C3   | 1.353(3)   |
| O4                       | N2               | 1.244(2)   |      |      |            |
| <sup>1</sup> 2-X,1-Y,1-Z |                  |            |      |      |            |
| <b>Li-4HP2</b>           |                  |            |      |      |            |
| O5                       | N3               | 1.2521(13) | N4   | C11  | 1.3514(15) |
| O5                       | Li1              | 2.333(2)   | N2   | C8   | 1.3530(17) |
| O6                       | Li1              | 1.935(2)   | N2   | C7   | 1.3490(17) |
| O2                       | C10              | 1.2812(13) | C6   | C10  | 1.4276(15) |
| O1                       | C1               | 1.2726(13) | C6   | C7   | 1.3632(16) |
| O1                       | Li1              | 1.942(2)   | C5   | C11  | 1.3644(15) |
| O1                       | Li1 <sup>1</sup> | 1.962(2)   | C5   | C1   | 1.4289(15) |
| O7                       | N3               | 1.2462(13) | C3   | C2   | 1.3638(16) |
| O3                       | N3               | 1.2529(13) | C9   | C10  | 1.4250(15) |
| O3                       | Li1              | 2.157(2)   | C9   | C8   | 1.3612(16) |
| N4                       | C3               | 1.3522(16) | C2   | C1   | 1.4339(15) |
| <sup>1</sup> 2-X,1-Y,-Z  |                  |            |      |      |            |
| <b>Mg-4HP</b>            |                  |            |      |      |            |
| Mg1                      | O6               | 2.054(3)   | N4   | O11  | 1.226(4)   |
| Mg1                      | O1               | 2.078(3)   | N1   | C1   | 1.346(5)   |
| Mg1                      | O3               | 2.031(3)   | N1   | C5   | 1.339(6)   |
| Mg1                      | O4               | 2.086(3)   | N2   | C9   | 1.337(6)   |
| Mg1                      | O5               | 2.058(3)   | N2   | C8   | 1.333(6)   |
| Mg1                      | O2               | 2.067(3)   | C6   | C10  | 1.407(5)   |
| O8                       | C6               | 1.282(4)   | C6   | C7   | 1.416(5)   |
| O7                       | C3               | 1.278(4)   | C3   | C2   | 1.420(5)   |
| O9                       | N4               | 1.259(4)   | C3   | C4   | 1.430(5)   |
| O10                      | N4               | 1.243(4)   | C2   | C1   | 1.348(5)   |
| O13                      | N3               | 1.251(4)   | C10  | C9   | 1.352(6)   |
| O12                      | N3               | 1.248(4)   | C7   | C8   | 1.351(6)   |
| O14                      | N3               | 1.221(4)   | C4   | C5   | 1.353(6)   |

**Table S4.** Bond Angles (°) for **Li-4HP**, **Li-4HP2**, and **Mg-4HP**.

| Atom           | Atom | Atom             | Angle      | Atom            | Atom | Atom            | Angle      |
|----------------|------|------------------|------------|-----------------|------|-----------------|------------|
| <b>Li-4HP</b>  |      |                  |            |                 |      |                 |            |
| C1             | O1   | Li1              | 134.44(19) | O1              | Li1  | O3              | 132.1(2)   |
| C1             | O1   | Li1 <sup>1</sup> | 132.27(18) | O1 <sup>1</sup> | Li1  | O3              | 99.79(19)  |
| Li1            | O1   | Li1 <sup>1</sup> | 92.46(18)  | O1 <sup>1</sup> | Li1  | O2              | 119.3(2)   |
| N2             | O3   | Li1              | 104.90(17) | O1              | Li1  | O2              | 114.6(2)   |
| N2             | O4   | Li1              | 81.90(16)  | O1              | Li1  | O4              | 90.07(16)  |
| O3             | N2   | O5               | 119.23(19) | O1 <sup>1</sup> | Li1  | O4              | 139.1(2)   |
| O2             | Li1  | O3               | 102.64(19) | O1              | Li1  | O1 <sup>1</sup> | 87.54(18)  |
| O2             | Li1  | O4               | 98.65(18)  | O1              | C1   | C2              | 122.7(2)   |
| O4             | N2   | O3               | 118.90(19) | C5              | C1   | C2              | 115.2(2)   |
| O3             | Li1  | O4               | 54.25(12)  | C4              | C5   | C1              | 121.0(2)   |
| O4             | N2   | Li1              | 70.70(15)  | C5              | C4   | N1              | 121.0(2)   |
| C3             | N1   | C4               | 121.0(2)   | C3              | C2   | C1              | 121.0(2)   |
| O1             | C1   | C5               | 122.1(2)   | N1              | C3   | C2              | 120.7(2)   |
| <b>Li-4HP2</b> |      |                  |            |                 |      |                 |            |
| N3             | O5   | Li1              | 85.91(8)   | O1              | C1   | C5              | 122.05(10) |
| O7             | N3   | O5               | 120.07(10) | O6              | Li1  | O1 <sup>1</sup> | 109.61(10) |
| O7             | N3   | O3               | 121.39(10) | O6              | Li1  | O3              | 99.86(9)   |
| C8             | C9   | C10              | 120.35(11) | N4              | C11  | C5              | 121.59(11) |
| O2             | C10  | C6               | 122.01(10) | O1              | Li1  | O5              | 102.05(9)  |
| C11            | N4   | C3               | 120.50(10) | O1 <sup>1</sup> | Li1  | O5              | 153.95(11) |
| C7             | N2   | C8               | 120.84(10) | O1              | Li1  | O1 <sup>1</sup> | 86.43(8)   |
| C7             | C6   | C10              | 121.03(11) | O1 <sup>1</sup> | Li1  | O3              | 100.79(9)  |
| C11            | C5   | C1               | 120.40(10) | O1              | Li1  | O3              | 139.90(11) |
| N4             | C3   | C2               | 121.07(11) | O2              | C10  | C9              | 122.20(10) |
| <b>Mg-4HP</b>  |      |                  |            |                 |      |                 |            |
| O6             | Mg1  | O1               | 93.29(11)  | O14             | N3   | O13             | 120.3(4)   |
| O6             | Mg1  | O4               | 86.46(11)  | O14             | N3   | O12             | 120.8(4)   |
| O6             | Mg1  | O5               | 92.28(12)  | C5              | N1   | C1              | 120.6(4)   |
| O6             | Mg1  | O2               | 88.23(12)  | C8              | N2   | C9              | 120.1(4)   |
| O1             | Mg1  | O4               | 179.73(13) | O8              | C6   | C10             | 122.1(3)   |
| O3             | Mg1  | O6               | 177.94(14) | O8              | C6   | C7              | 121.9(3)   |
| O3             | Mg1  | O1               | 88.72(12)  | C10             | C6   | C7              | 115.9(4)   |
| O3             | Mg1  | O4               | 91.54(12)  | O7              | C3   | C2              | 122.3(3)   |
| O3             | Mg1  | O5               | 88.18(12)  | O7              | C3   | C4              | 122.7(3)   |
| O3             | Mg1  | O2               | 91.31(12)  | C2              | C3   | C4              | 115.0(3)   |
| O5             | Mg1  | O1               | 90.59(12)  | C1              | C2   | C3              | 121.1(4)   |
| O5             | Mg1  | O4               | 89.32(13)  | C9              | C10  | C6              | 120.0(4)   |
| O5             | Mg1  | O2               | 179.49(14) | N1              | C1   | C2              | 121.2(4)   |

---

| Atom | Atom | Atom | Angle     | Atom | Atom | Atom | Angle    |
|------|------|------|-----------|------|------|------|----------|
| O2   | Mg1  | O1   | 89.38(13) | C8   | C7   | C6   | 120.7(4) |
| O2   | Mg1  | O4   | 90.71(13) | C5   | C4   | C3   | 120.9(4) |
| O10  | N4   | O9   | 119.4(3)  | N1   | C5   | C4   | 121.2(4) |
| O11  | N4   | O9   | 119.7(4)  | N2   | C9   | C10  | 122.0(4) |
| O11  | N4   | O10  | 120.9(4)  | N2   | C8   | C7   | 121.2(4) |
| O12  | N3   | O13  | 118.9(3)  |      |      |      |          |

---

**Table S5.** Hydrogen Atom Coordinates ( $\text{\AA}\times 10^4$ ) and Isotropic Displacement Parameters ( $\text{\AA}^2\times 10^3$ ) for **Li-4HP**, **Li-4HP2**, and **Mg-4HP**.

| Atom           | <i>x</i> | <i>y</i> | <i>z</i> | $U_{(eq)}$ |
|----------------|----------|----------|----------|------------|
| <b>Li-4HP</b>  |          |          |          |            |
| H2A            | 7026.9   | 6986.59  | 5940.21  | 50         |
| H2B            | 8425.21  | 7048.1   | 7231.4   | 50         |
| H1             | 5450.61  | 6172.46  | 8160.72  | 39         |
| H5             | 9152.96  | 4333.91  | 1071.01  | 35         |
| H4             | 7460.85  | 4738.94  | 8585.31  | 41         |
| H2             | 6623.46  | 6952.82  | 2586.91  | 35         |
| H3             | 5008.96  | 7302.54  | 49.21    | 40         |
| <b>Li-4HP2</b> |          |          |          |            |
| H6A            | 9537.12  | 1044.24  | 1296.02  | 39         |
| H6B            | 10264.22 | 1442.95  | 9859.22  | 39         |
| H4             | 1345.57  | 7682.56  | 2040.91  | 25         |
| H2A            | 2877.4   | 88362.9  | 4596.34  | 28         |
| H6             | 5758.26  | 1215.29  | 2511     | 24         |
| H5             | 6181.32  | 8201.62  | 9688.3   | 23         |
| H3             | 2608.06  | 5220.76  | 2806.65  | 25         |
| H11            | 3008.67  | 9168.51  | 517.67   | 25         |
| H9             | 8277.93  | 6646.81  | 3523.05  | 25         |
| H8             | 5407.3   | 6328.43  | 4602.25  | 28         |
| H7             | 2950.46  | 777.53   | 3627.81  | 27         |
| H2             | 5769.4   | 4145.74  | 2069     | 22         |
| <b>Mg-4HP</b>  |          |          |          |            |
| H6A            | 4598.43  | 3957.01  | 5958.13  | 57         |
| H6B            | 5159     | 3778.36  | 6029.46  | 57         |
| H1A            | 4760.19  | 4962.9   | 6907.34  | 52         |
| H1B            | 5101.31  | 6410.23  | 7208.17  | 52         |
| H3A            | 4897.35  | 973.77   | 6728.25  | 60         |
| H3B            | 5413.16  | 1076.07  | 6652.08  | 60         |
| H4A            | 5220.17  | 956.86   | 5610.4   | 54         |
| H4B            | 4924.09  | 8279.29  | 5321.68  | 54         |
| H5A            | 6007.99  | 5609.6   | 6682.33  | 59         |
| H5B            | 6125.76  | 7655.16  | 6675.41  | 59         |
| H2A            | 3886.37  | 7172.57  | 5837     | 63         |
| H2B            | 3998.82  | 9226.72  | 5848.44  | 63         |
| H1             | 7530.38  | 4267.92  | 5622.89  | 52         |
| H2             | 2457.43  | 721.63   | 6861.81  | 59         |
| H2C            | 6014.33  | 6056.19  | 5581.47  | 46         |
| H10            | 3981.05  | 8806.88  | 6965.08  | 55         |



| Atom | <i>x</i> | <i>y</i> | <i>z</i> | $U_{(eq)}$ |
|------|----------|----------|----------|------------|
| H1C  | 6933.89  | 6815.87  | 5675.73  | 53         |
| H7   | 3631.92  | 4918.04  | 7057.81  | 56         |
| H4   | 6358.51  | 26.34    | 5340.01  | 51         |
| H5   | 7274.04  | 956.17   | 5454.69  | 58         |
| H9   | 3055.98  | 8812.87  | 6876.63  | 66         |
| H8   | 2714.61  | 4051.15  | 6954.44  | 64         |

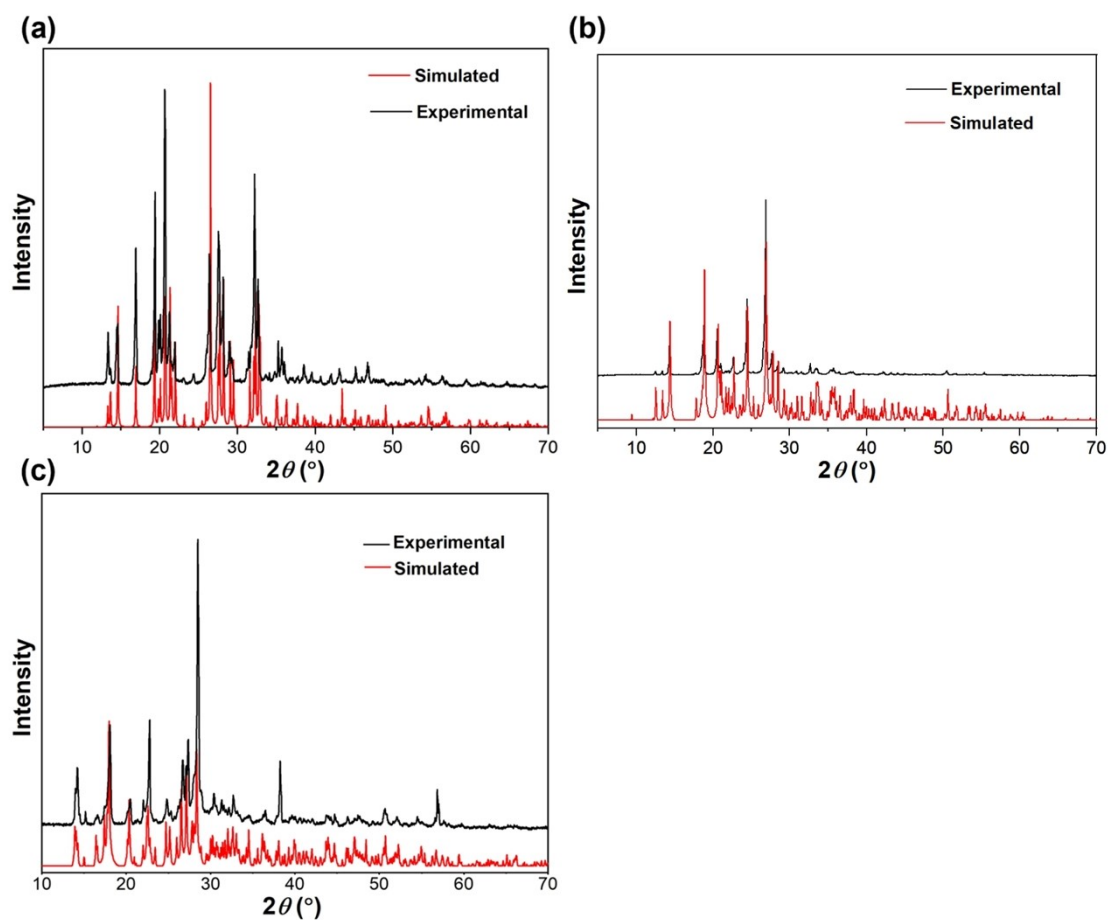

**Fig. S1** Experimental and simulated PXRD patterns of (a) Li-4HP, (b) Li-4HP2, and (c) Mg-4HP.

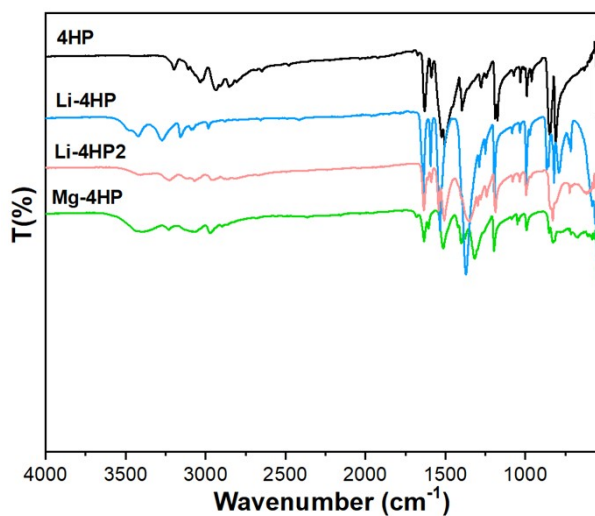

**Fig. S2** IR spectra for 4HP, Li-4HP, Li-4HP2, and Mg-4HP.

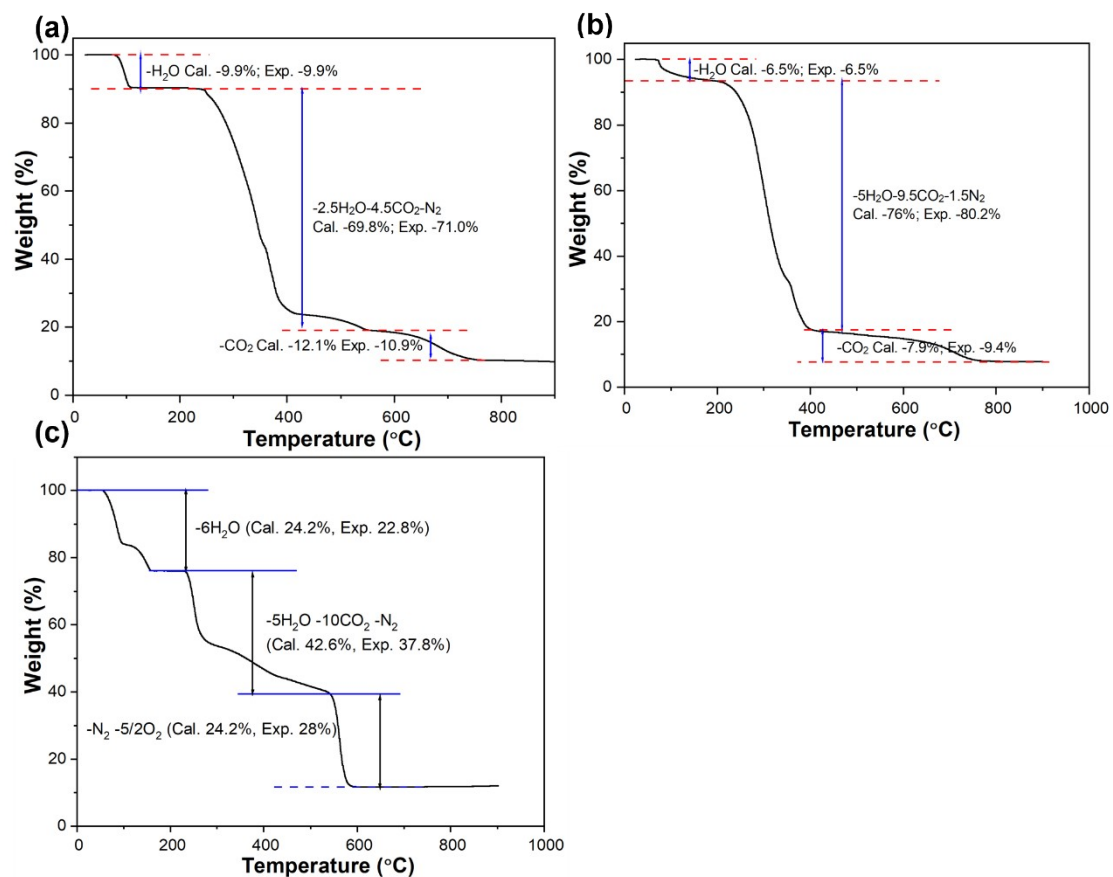

**Fig. S3** TGA diagrams of (a) Li-4HP, (b) Li-4HP2, and (c) Mg-4HP.

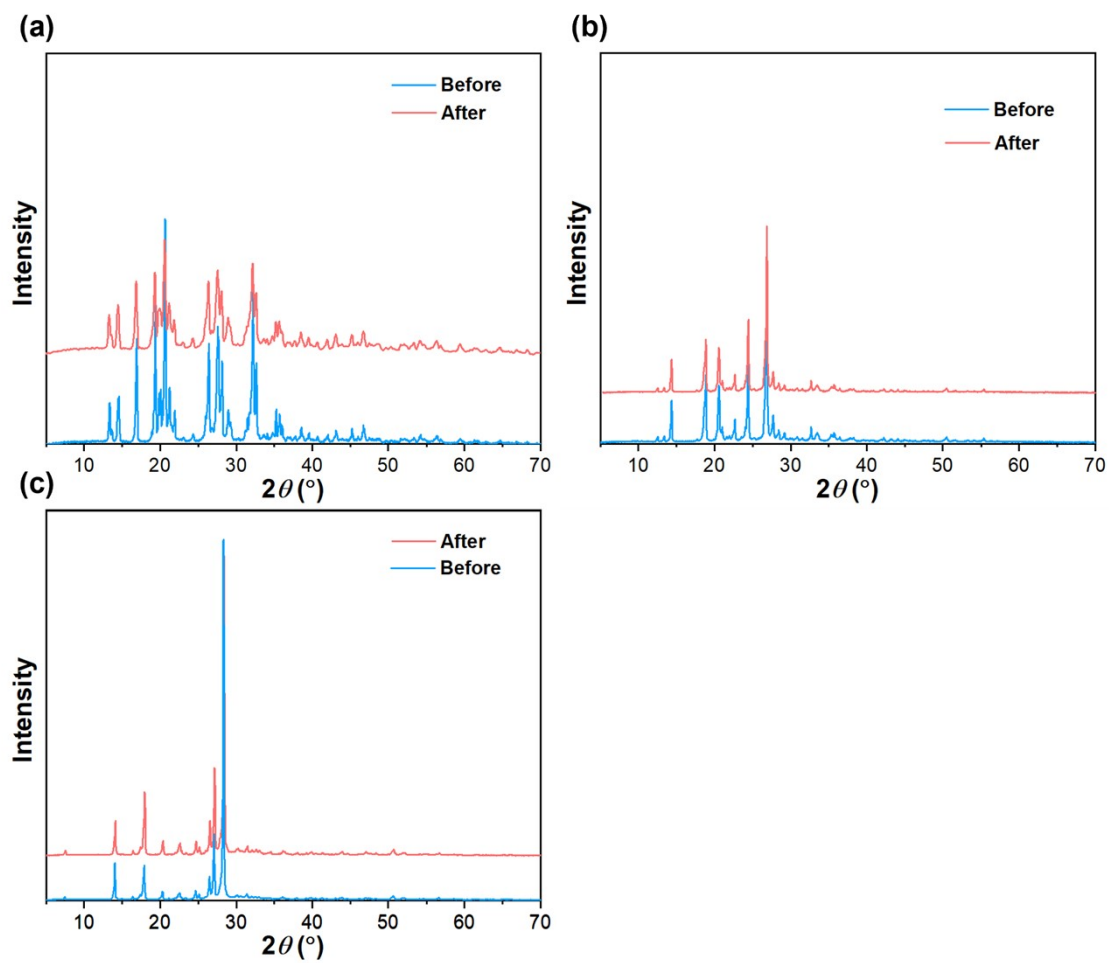

**Fig. S4** PXRD patterns of (a) **Li-4HP**, (b) **Li-4HP2**, and (c) **Mg-4HP** before (Blue) and after (Red) exposure to air.

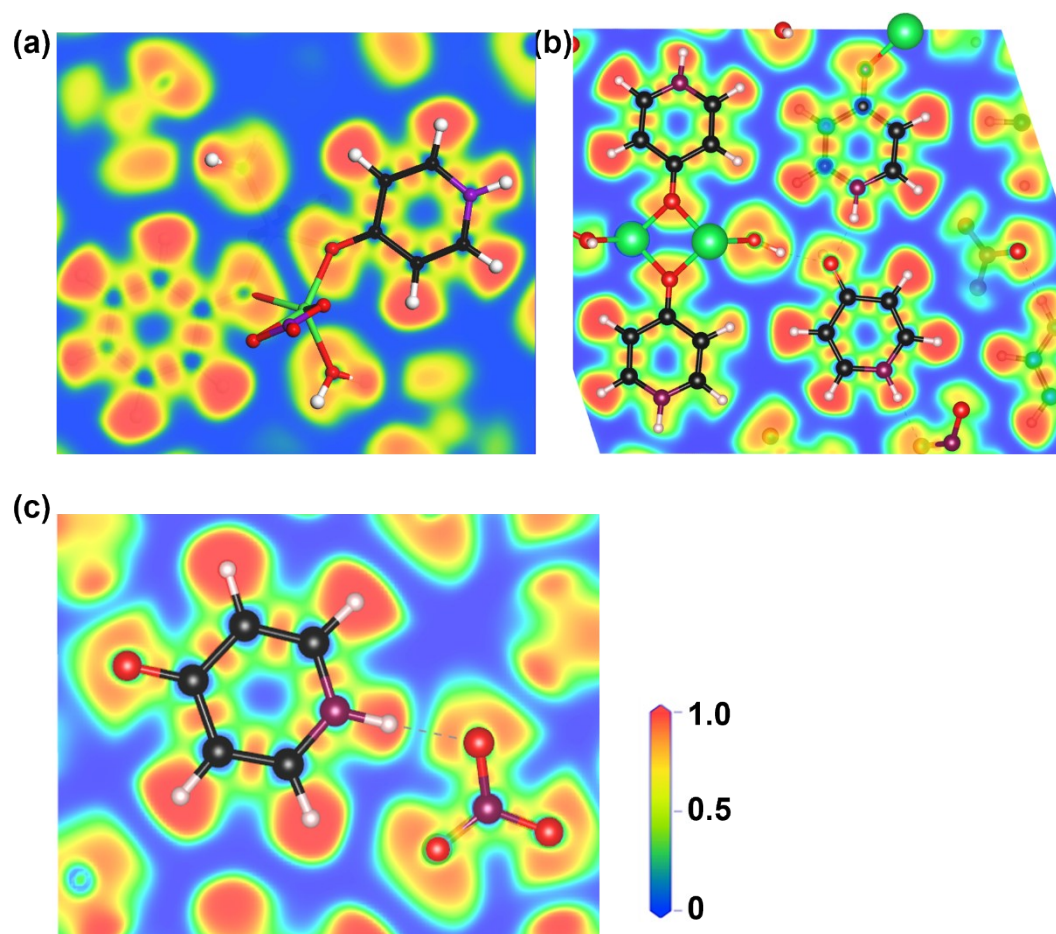

Fig. S5 ELF diagrams of (a) Li-4HP, (b) Li-4HP2, and (c) Mg-4HP.

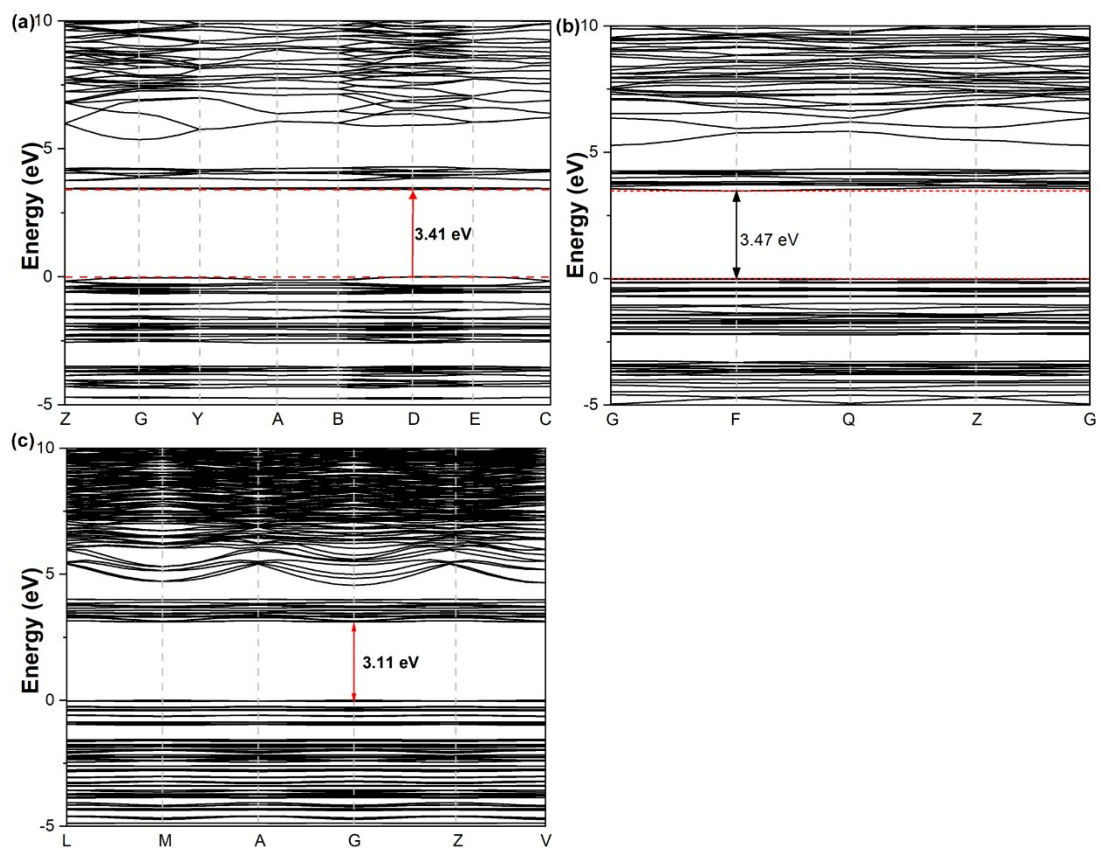

**Fig. S6** Band structures of (a) Li-4HP, (b) Li-4HP2, and (c) Mg-4HP.

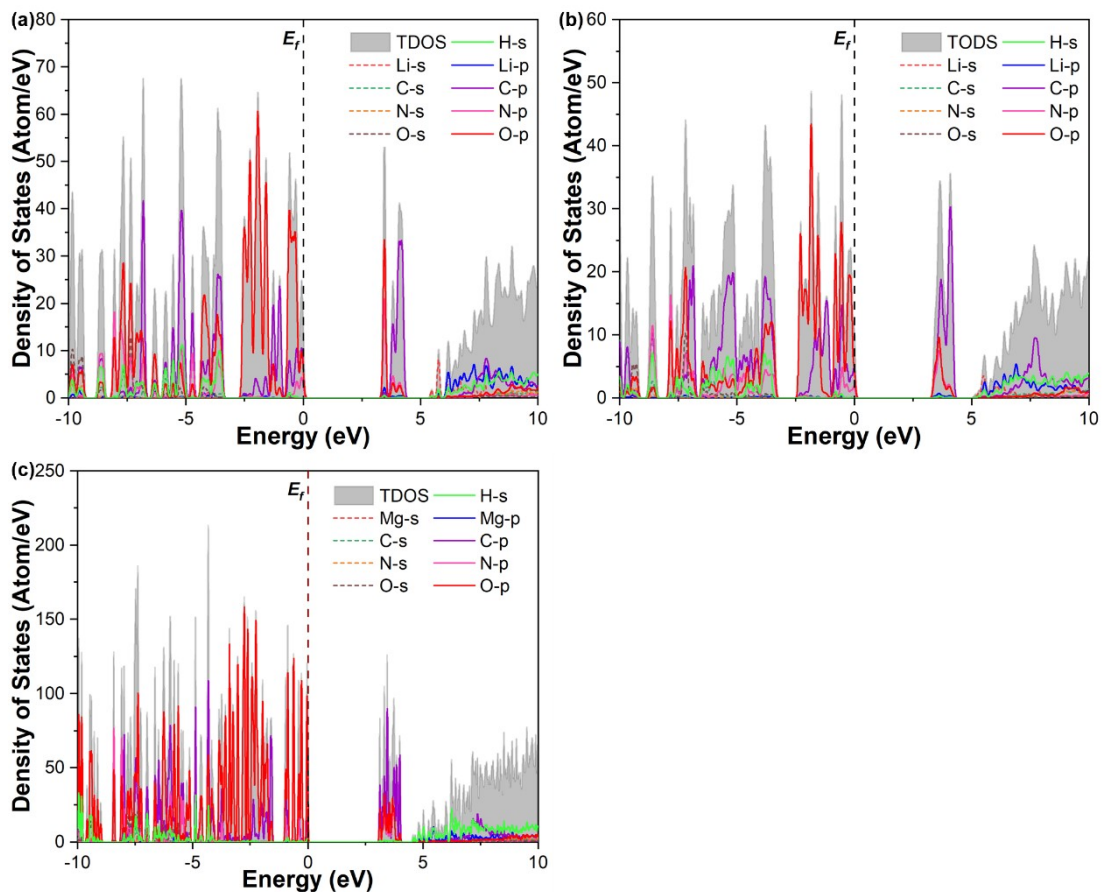

Fig. S7 Total and partial DOS for (a) Li-4HP, (b) Li-4HP2, and (c) Mg-4HP.

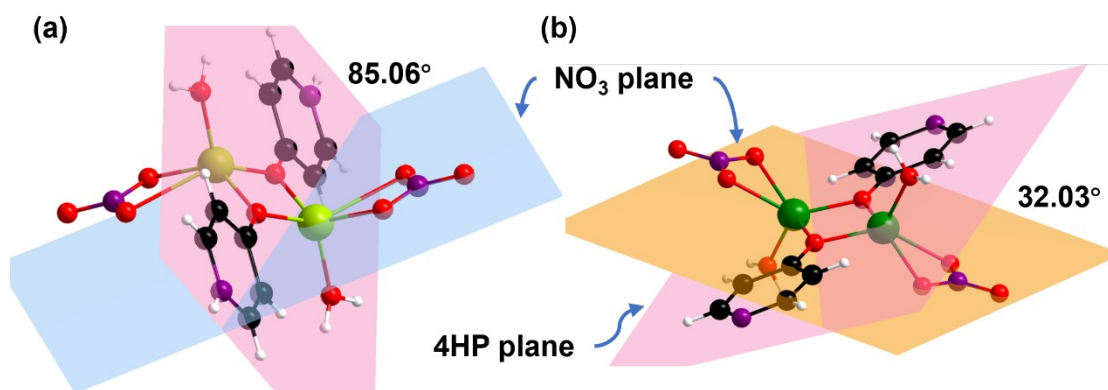

Fig. S8 Dihedral angles between 4HP and  $\text{NO}_3$  among the  $[\text{LiNO}_3 \cdot \text{H}_2\text{O} \cdot 4\text{HP}]_2$  dimers in (a) Li-4HP and (b) Li-4HP2.

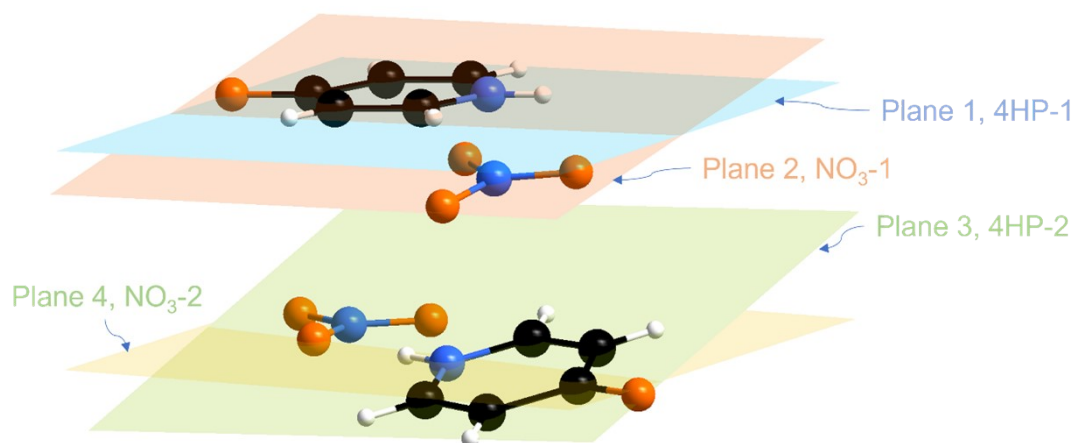

|                    | 4HP-1 | NO <sub>3</sub> -1 | 4HP-1 | NO <sub>3</sub> -1 |
|--------------------|-------|--------------------|-------|--------------------|
| 4HP-1              |       | 9.51               | 14.42 | 1.45               |
| NO <sub>3</sub> -1 | 9.51  |                    | 5.02  | 9.88               |
| 4HP-2              | 14.42 | 5.02               |       | 14.88              |
| NO <sub>3</sub> -2 | 1.45  | 9.88               | 14.88 |                    |

Fig. S9 Dihedral angles between the coplanar groups in Mg-4HP.

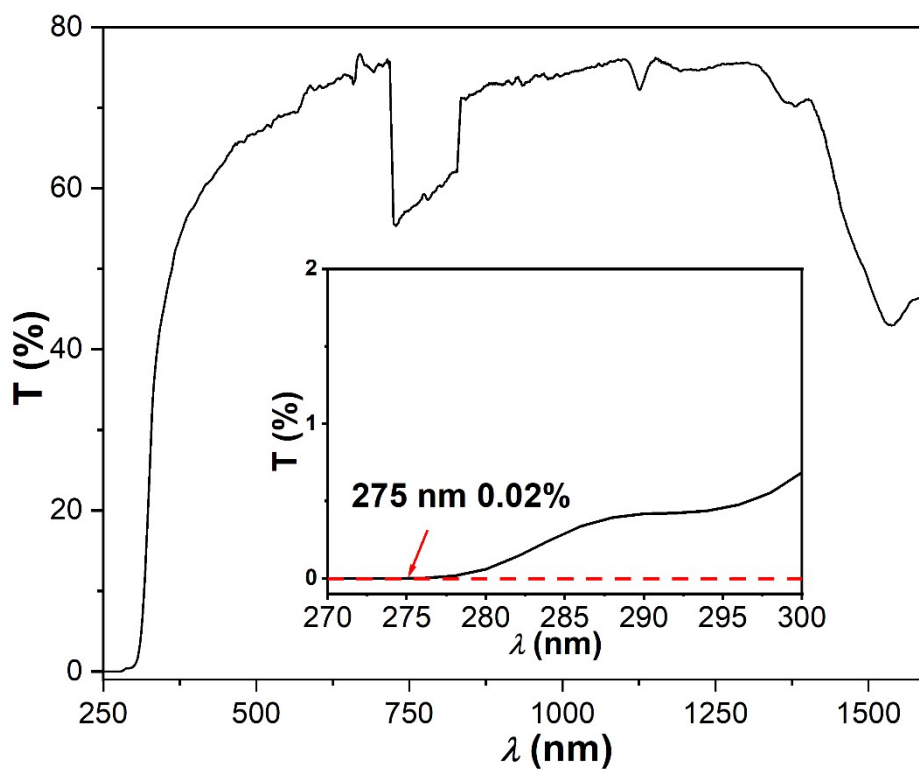

Fig. S10 UV-vis-NIR transmittance spectrum for Mg-4HP.



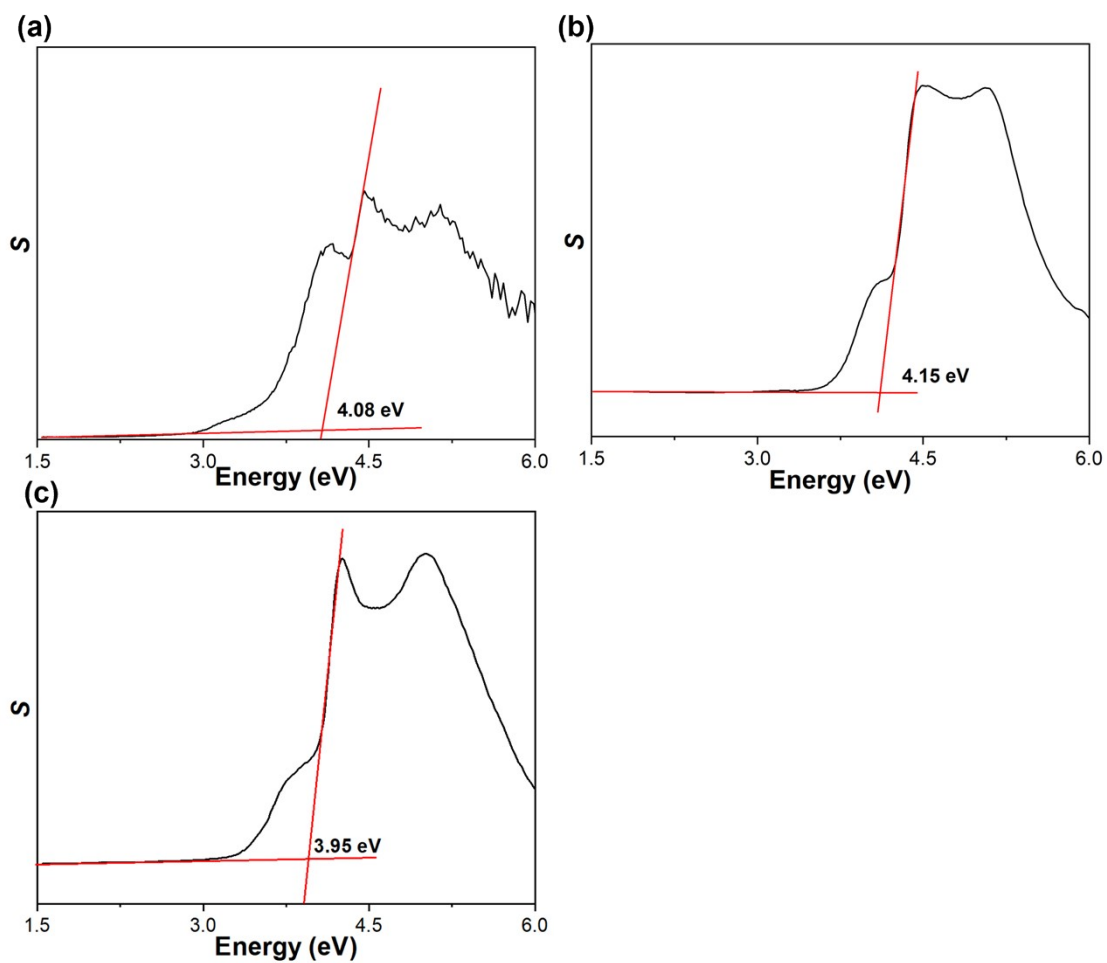

**Fig. S11** Experimental bandgaps for (a) Li-4HP, (b) Li-4HP2, and (c) 4HP.

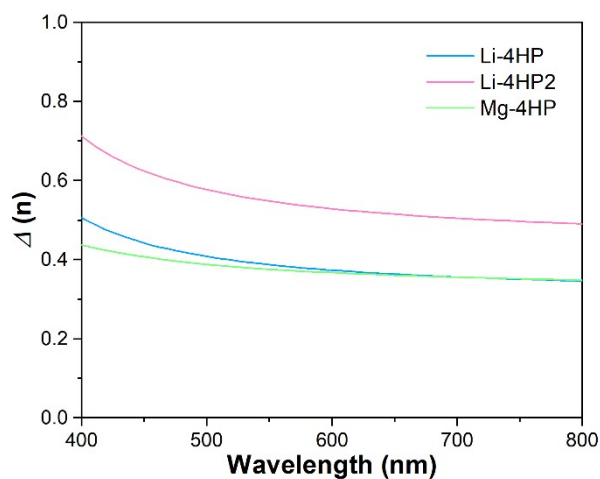

**Fig. S12** Calculated birefringence of Li-4HP, Li-4HP2, and Mg-4HP.

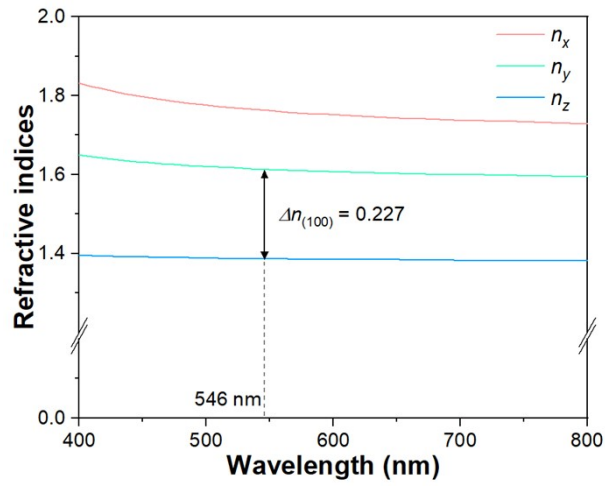

**Fig. S13** Calculated refractive indices and birefringence on (100) crystal plane of **Mg-4HP**.

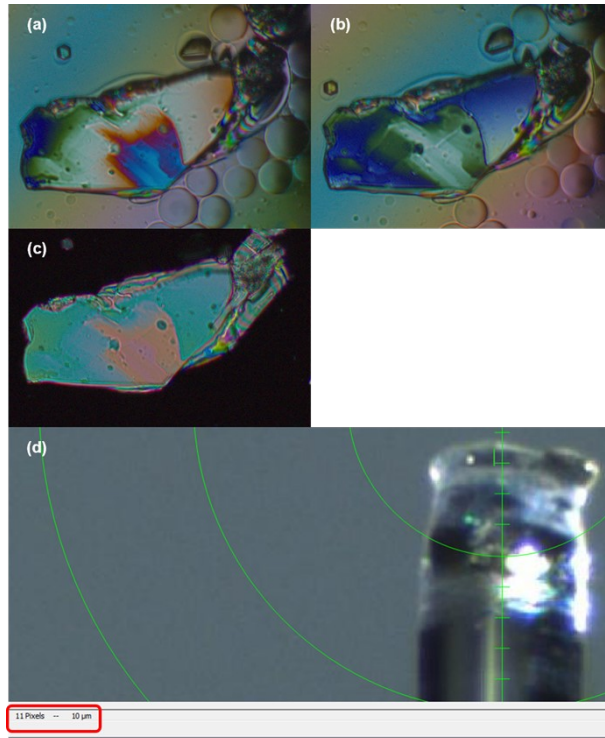

**Fig. S14** (a-c) a **Li-4HP** crystal observed under cross-polarized light achieving complete extinction under a polarizing microscope and (d) thickness of a **Li-4HP** crystal.

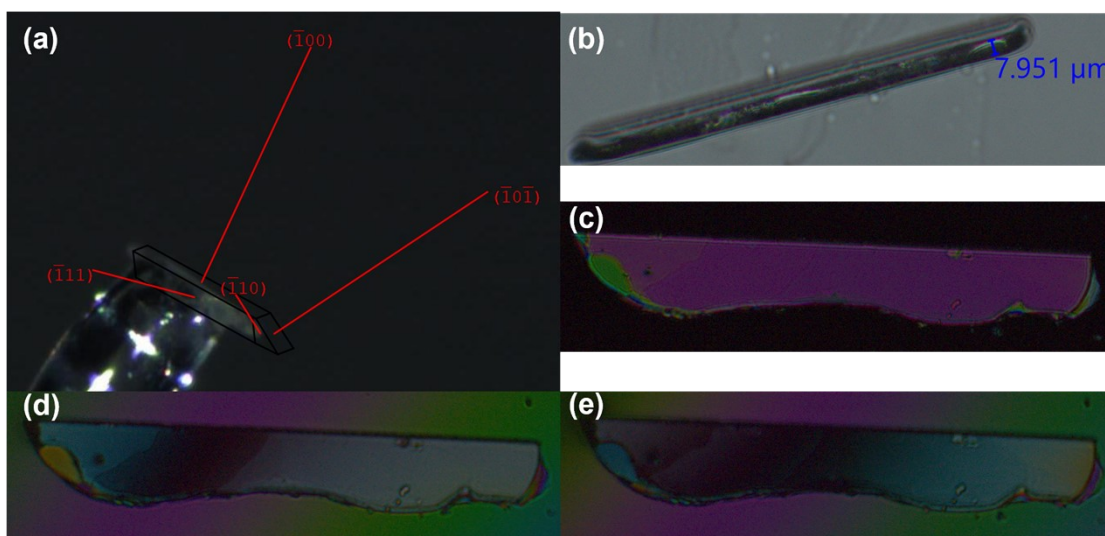

**Fig. S15** (a) Crystal orientation observed via the single-crystal XRD; (b) Thickness of a **Mg-4HP** crystal and (c-e) a **Mg-4HP** crystal observed under cross-polarized light achieving complete extinction under a polarizing microscope.

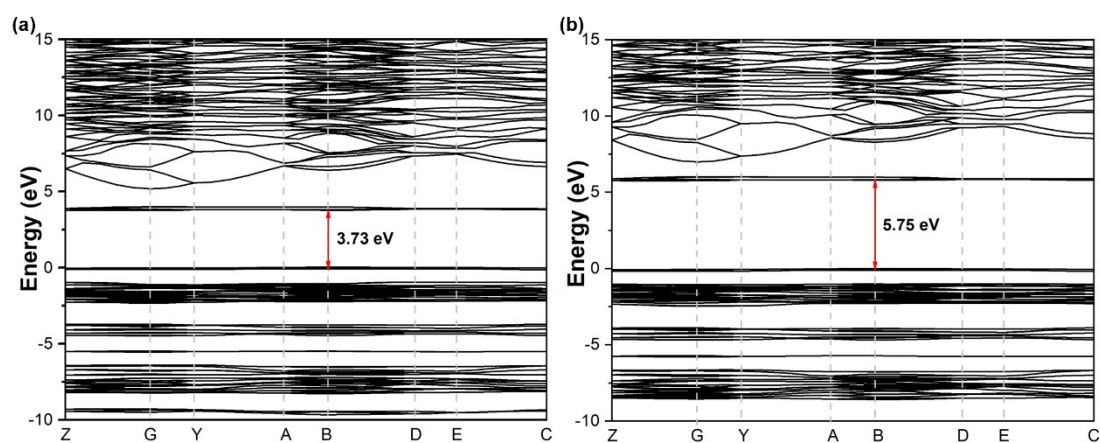

**Fig. S16** Band structures of  $\text{Mg}(\text{NO}_3)_2 \cdot 6\text{H}_2\text{O}$  depicted by (a) GGA functional and (b) HSE06 functional.

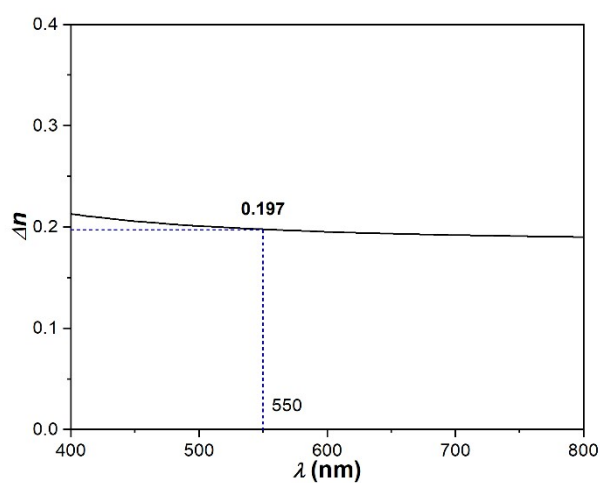

**Fig. S17** Calculated birefringence of  $\text{Mg}(\text{NO}_3)_2 \cdot 6\text{H}_2\text{O}$ .

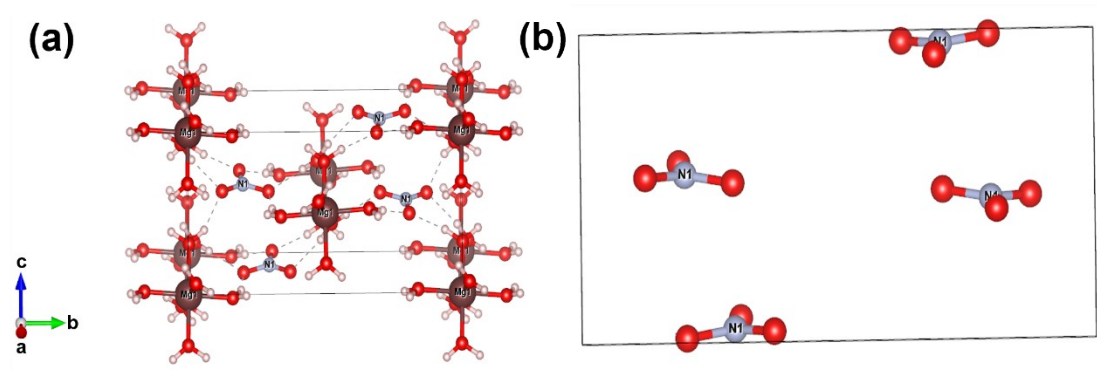

**Fig. S18** Ball-and-stick representations of (a)  $\text{Mg}(\text{NO}_3)_2 \cdot 6\text{H}_2\text{O}$  and (b)  $\text{NO}_3$  in the lattice viewed along the  $a$ -axis.

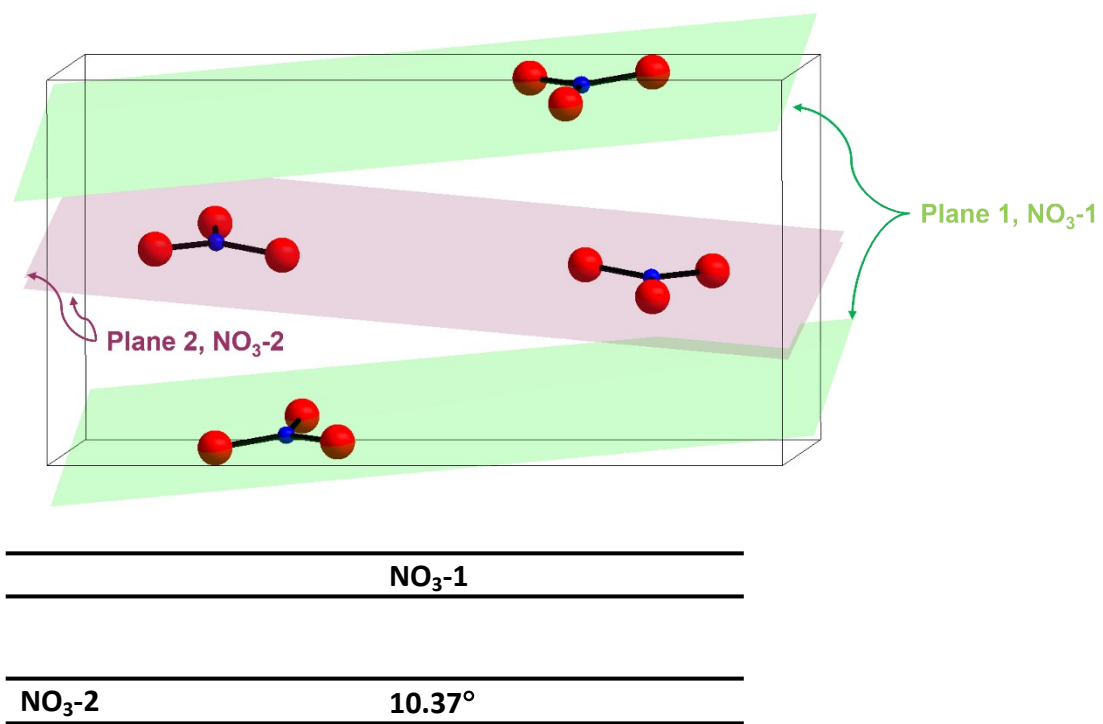

**Fig. S19** Dihedral angles between the  $\text{NO}_3$  groups in  $\text{Mg}(\text{NO}_3)_2 \cdot 6\text{H}_2\text{O}$ .
